# Supplementary material for: Contributions of a Child’s Built, Natural, and Social Environments to Their General Cognitive Ability: A Systematic Scoping Review
Source: PLoS One. 2016 Feb 3;11(2):e0147741. doi: 10.1371/journal.pone.0147741 (PMC4739499; doi:10.1371/journal.pone.0147741)
Supplement: S1 Table — Publications are grouped by study and country. (XLSX) [file pone.0147741.s002.xlsx]

## Sheet: S1
Country	First Author	Name of Study or City	Study Type*	Year of Recruitment	Sample Size	Years of Cognitive Assessment	Test Type**	EOI	Reference #
Australia	Anderson (2003)	Victoria	P	1991	508	8	WISC-III	Preterm/LBW	95
Australia	Bourke (2003)		CS		137	7-12	WASI	SDB	116
Australia	Galbally (2011)	Melbourne-Mercy	P	2004	41	2	BSID-III	Antidepressants	232
Australia	Ing (2012)	Raine	P	1989	2608	10	RCPM	Anesthesia	238
Australia	Whitehouse (2012)	Raine	P	1989	1389	10	RCPM	Hypertension	278
Australia	Jackman (2012)	Melbourne	CS	2008	153	3-5	SB-V (short)	SDB	114
Australia	Kennedy (2004)	Adelaide	CS		26	5-10	WPPSI-R, WISC-III	SDB	112
Australia	Kohler (2009)	Adelaide	CS	2003	92	3-12	SB-V	SDB	120
Australia	Meldrum (2012)	IFOS	P-RCT	2005	324	1	BSID-III	Allergy	252
Australia	O'Callaghan (2007)	MUSP	P	1981	3731	14	RSPM	Alcohol	165
Australia	Najman (2009)	MUSP	P	1981	2937	14	RSPM	Poverty	259
Australia	Piteo (2012)	DOMINO	P-RCT	2005	360	1.5	BSID-III	Depression	136
Australia	Tong (2007)	Port Pirie	P	1979	601	2, 4, 7, 11-13	BSID, MSCA, WISC-R	Paternal occupational social class, Cognitive stimulation at home, Maternal intelligence	72
Australia	Tong (2006)	Port Pirie	P	1979	601	2, 4, 7, 11-13	BSID, MSCA, WISC-R	Birthweight	73
Australia	Zhou (2007)	Adelaide	P-RCT	1998	302	4	SB-IV	Breastfeeding	63
Bangladesh	Hamadani (2010)	MINIMat	P-RCT	2002	2009	1.5	BSID-II	As	174
Bangladesh	Hamadani (2011)	MINIMat	P-RCT	2002	2260	5	WPPSI-III	As	175
Bangladesh	Tofail (2012)	Dhaka	P-RCT	2000	249	0.75	BSID-II	LBW	70
Bangladesh	Wasserman (2007)	HEALS	CS	2004	296	6	WPPSI-III	As	64
Bangladesh	Wasserman (2004)	HEALS	CS	2002	201	9-10	WISC-III	As	65
Bangladesh	Wasserman (2006)	HEALS	CS	2002	142	9-10	WISC-III	Mn	99
Bangladesh	Wasserman (2011)	HEALS	CS	2006	303	8-11	WISC-IV	As, Mn	100
Belarus	Yang (2011)	PROBIT	P-RCT	1996	11899	6.5	WASI	Physical growth	102
Belarus	Yang (2012)	PROBIT	P-RCT	1996	13059	6.5	WASI	Paternal alcohol, Family structure	169
Brazil	Menezes-Filho (2011)	Cotegipe	CS		83	6-12	WISC-III	Mn	39
Brazil	Silva Rde (2012)		CS		264	7-14	RCPM	Malnutrition, Domestic violence	66
Canada	Bouchard (2011)	Quebec	CS	2007	362	6-13	WASI	Mn	192
Canada	Chan (2010)	Toronto	P	1997	99	3-7	WPPSI-III	Hypertension medication - Labetalol	128
Canada	Gruber (2010)	Quebec	CS		39	7-11	WISC-IV	Sleep duration	80
Canada	Jacobson (2008)	ECCDS	P	1995	109	11	BSID-II	LC-PUFA	152
Canada	Laslo-Baker (2004)	Toronto	P	1989	64	3-5	WPPSI-R, WISC-III	Organic solvents	246
Canada	Nulman (2004)	Toronto	P	1987	102	3-8	BSID-II, MSCA, WISC-III	Binge drinking	262
Canada	Nulman (2009)	Toronto	P	1998	121	3-7	WPPSI-R, WISC-III	Nausea	261
Canada	Nulman (2012)	Toronto	P	2001	240	3-7	WPPSI-III	Antidepressants	125
Canada	Williamson (2005)		CS	2001	59	3-5	BSID-II	Income, Maternal employment status	46
Canada	Wu (2012)	Vancouver	P		154	1.5	BSID-III	Choline, Betaine	281
China	Li (2010)		R	2004	213	2-2.5	BSID	Thyroid hormone	129
China	Wang (2007)		CS	2003	720	8-12	RCPM (China)	As, F	173
Denmark	Falgreen Eriksen (2012)	LDPS	P	1997	1628	5	WPPSI-R	Alcohol	163
Denmark	Falgreen Eriksen (2012)	LDPS	P	1997	1782	5	WPPSI-R	Tobacco	226
Denmark	Kesmodel (2012)	LDPS	P	1997	1628	5	WPPSI-R	Alcohol	164
Denmark	Kesmodel (2012)	LDPS	P	1997	1617	5	WPPSI-R	Binge drinking	244
Ecuador	Harari (2010)	Tabacundo-Cayambe	CS		84	6-8	RCPM	Pesticides	208
Egypt	El-khayat (2007)		P	2006	57	0.5-2	BSID-II	LC-PUFA	151
Faroe Islands	Julvez (2011)	Faroe	P	1994	182	2.5, 3.5, 4.5, 5.5	BSID-II	Thyroid hormones	241
Finland	Gaily (2004)	Helsinki	P	1989	323	5-9	WPPSI-R, WISC-R	AED	231
Finland	Munck (2010)	PIPARI	P	2001	374	2	BSID-II	LBW	92
Finland	Munck (2012)	PIPARI	P	2001	292	2, 5	BSID-II	LBW	93
France	Larroque (2008)	EPIPAGE	P	1997	3568	5	K-ABC	Preterm	109
France	Sutter-Dallay (2011)	MATQUID	P	1996	515	0.25, 0.5, 1, 1.5, 2	BSID-II	Depression	57
Germany	Wilhelm (2008)	Duisburg	P	2000	189	2	BSID-II	PCB, Dioxins	279
Greece	Chatzi (2012)	Rhea	P	2007	553	1.5	BSID-III	Folate	159
Greece	Koutra (2012)	Rhea	P	2007	605	1.5	BSID-III	Sociodemographic determinants (parent age, education, marital status, employment and origin, siblings)	58
Greece	Koutra (2013)	Rhea	P	2007	470	1.5	BSID-III	Mental health	135
India	Chaudhari (2004)		P	1987	270	12	WISC-R	LBW	90
India	Raman (2010)		CS		32	5-9	WISC (India)	Alcohol dependence	166
India	Saxena (2012)		CS		170	12	RSPM	Fluoride	178
India	Shivaprakash (2011)		CS	2010	160	7-11	RCPM	Fluorosis	180
India	Thomas (2007)	Kerala Registry	P	2000	272	6-7	BSID-II (India)	Epilepsy	273
India	von Ehrenstein (2007)		CS	2001	326	5-15	WISC, WISC-III	As	176
Iran	Seraj (2012)		CS		293	6-11	RCPM	Fluoride	179
Israel	Feldman (2005)		P		138	0.5, 1, 2	BSID-II	Multiple gestation	97
Italy	Deroma (2013)		P	1999	154	7-9	WISC-III	Hg, Fish	71
Italy	Lucchini (2012)	Brescia	CS		299	11-14	WISC-III	Pb, Mn	157
Italy	Miano (2011)		CS	2009	104	6-12	WISC-R	SDB	117
Italy	Tozzi (2012)	Rome	P-RCT	1992	1403	10-12	WISC-R	Breastfeeding	150
Japan	Nakajima (2006)	Hokaido Study on ECH	P	2002	134	0.5	BSID-II	PCB, Dioxins	260
Mexico	Bahena Medina (2011)	Morelos	P	2001	265	1 month	BSID-II (Spanish)	DDT	140
Mexico	del Rio Garcia (2009)	Morelos	P	2001	253	0-1	BSID-II (Spanish)	B12, Folate, MTHFR	158
Mexico	Torres-Sanchez (2007)	Morelos	P	2001	244	0-1	BSID-II (Spanish)	DDT	141
Mexico	Torres-Sanchez (2009)	Morelos	P	2001	270	1, 1.5, 2, 2.5	BSID-II (Spanish)	DDT	146
Mexico	Torres-Sanchez (2013)	Morelos	P	2001	203	3.5, 4, 4.5, 5	MSCA (Spanish)	DDT	211
Mexico	Pilsner (2010)	ELEMENT/FLERIS	P	1994	255	2	BSID-II (Spanish)	MTHFR	127
Mexico	Tellez-Rojo (2006)	ELEMENT/FLERIS	P	1994, 1997	294	1, 2	BSID-II (Spanish)	Pb	79
Mexico	Claus Henn (2010)	ELEMENT/FLERIS	P	1997	455	1, 1.5, 2, 2.5, 3	BSID-II (Spanish)	Mn	40
Mexico	Claus Henn (2012)	ELEMENT/FLERIS	P	1997	455	1, 1.5, 2, 2.5, 3	BSID-II (Spanish)	Mn, Pb	188
Mexico	Hu (2006)	ELEMENT/FLERIS	P	1997	146	1, 2	BSID-II (Spanish)	Pb	98
Mexico	Surkan (2008)	ELEMENT/FLERIS	P	1997	379	2	BSID-II (Spanish)	Self esteem, Pb	78
Mexico	Riojas-Rodriguez (2010)	Molango	CS	2006	172	7-11	WISC-R (Spanish)	Mn	38
Mexico	Rocha-Amador (2007)	SanLuis Potosi, Durango	CS		132	6-9	WISC-R (Spanish)	As, F	47
Mexico	Schnaas (2006)		P	1987	150	0.5-22, 3-5, 6-10	BSID, MSCA,WISC-R (Spanish)	Pb	85
Netherlands	Albers (2010)	Nijmegen, Arnhem	P		64	0.25, 0.75	BSID-II (Dutch)	Child care	69
Netherlands	Bakker (2003)	Maastricht	P	1990	306	7-8	K-ABC	LC-PUFA	153
Netherlands	Veldwijk (2011)	Maastricht	P	1990	236	7-8	K-ABC	BMI	60
Netherlands	Cserjesi (2012)	Lollipip	P	2002	378	7	WISC-III (Dutch)(short)	Preterm	106
Netherlands	Huizink (2003)	Utrecht	P		170	0-1	BSID (Dutch)	Stress, Cortisol	137
Netherlands	Pop (2003)	Eindhoven	P	1997	125	1, 2	BSID (Dutch)	Thyroid hormones	131
Netherlands	Roze (2009)	GIC	P	2001	62	5-6	WPPSI-R (Dutch (short)	PBDE, HBCDD, PCB, DDT, Other organohalogens	266
New Zealand	Slykerman (2005)	ABC	P	1995	550	3.5	SB-IV	Stress, Social support	138
Poland	Edwards (2010)	CCCEH-Poland Mother and Newborn	P	2001	219	5	RCPM	PAH	50
Poland	Jedrychowski (2011)	CCCEH-Poland Mother and Newborn	P	2001	277	6	WISC-R (Poland)	Indoor mold	44
Poland	Jedrychowski (2007)	CCCEH-Poland Mother and Newborn	P	2001	374	1, 2, 3	BSID-II	Dietary Hg	51
Poland	Jedrychowski (2009)	CCCEH-Poland Mother and Newborn	P	2001	457	1, 2, 3	BSID-II	Pb	52
Poland	Jedrychowski (2009)	CCCEH-Poland Mother and Newborn	P	2001	444	1, 2, 3	BSID-II	Pb	53
Poland	Jedrychowski (2012)	CCCEH-Poland Mother and Newborn	P	2001	468	1, 2, 3, 6, 7	BSID-II	Breastfeeding	54
Poland	Jedrychowski (2006)	CCCEH-Poland Mother and Newborn	P	2001	233	1	WISC-III (Poland)	Hg	240
Poland	Pawlas (2012)		CS	2007	175	6-10	WPPSI, WISC-III (Poland)	ALAD, VDR genes	189
Portugal	Barrigas (2011)	Lisbon	CS		792	6-12	RCPM	BMI	219
S Korea	Cho (2010)	EPNDFPPOC	CS	2008	667	8-10	WISC (Korea)	Phthalates	202
S Korea	Kim (2013)	MOCEH	P	2006	884	0.5	BSID-II (Korea)	Pb, Cd	190
S Korea	Kim (2011)	MOCEH	P	2006	460	0.5	BSID-II (Korea)	Phthalates	200
S Korea	Lee (2011)	MOCEH	P	2006	414	0.5	BSID-II (Korea)	ETS	62
S Korea	Kim (2009)		CS	2007	279	8-11	WISC (Korea)	Pb, Mn	41
Scotland	Williams (2013)	Millenium	P	1999	97	5.5	MSCA	Thyroid hormones	83
Seychelles	Davidson (2006)	SCDS	P	1989	711	5.5, 9	MSCA,WISC-III	Hg	84
Seychelles	Watson (2011)	SCDS	P	1989	587	5.5	MSCA	Dental amalgam	277
Seychelles	Davidson (2008)	SCDS	P	2001	229	0.75, 2.5	BSID-II	Hg, Fish, Nutrition	223
Seychelles	Watson (2012)	SCDS	P	2001	242	0.75, 2.5	BSID-II	Dental amalgam	82
Slovakia	Park (2010)		P	2002	760	1.5	BSID-II	PCB	89
Slovakia	Park (2009)		P	2002	147	1.5	BSID-II	OH-PCB	264
Spain	Begega (2010)		P	1994	141	8-9	SB (Spanish)	Preterm	104
Spain	Gomez-Sanchiz (2004)		P	1995	238	2	BSID	Breastfeeding	61
Spain	Gomez-Sanchiz (2003)		P	1995	249	1.5	BSID	Breastfeeding	145
Spain	Soria-Pastor (2009)	Barcelona	R	1996	42	8-10	WISC-IV	Preterm	105
Spain	Freire (2010)	INMA-Granada	P	2000	72	4	MSCA (Spanish)	Hg, Fish	144
Spain	Freire (2010)	INMA-Granada	P	2000	178	4	MSCA (Spanish)	Thyroid hormone (child)	229
Spain	Freire (2010)	INMA-Granada	P	2000	210	4	MSCA (Spanish)	NO2	230
Spain	Puertas (2010)	INMA-Granada	P	2000	104	4	MSCA (Spanish)	Mirex	203
Spain	Forns (2012)	INMA-Menorca	P	1997	422	4	MSCA (Spanish)	PCB	227
Spain	Gascon (2011)	INMA-Menorca	P	1997	244	4	MSCA (Spanish)	PBDE	199
Spain	Julvez (2007)	INMA-Menorca	P	1997	420	4	MSCA (Spanish)	Smoking	242
Spain	Julvez (2009)	INMA-Menorca	P	1997	422	4	MSCA (Spanish)	Atopy	243
Spain	Julvez (2009)	INMA-Menorca	P	1997	420	4	MSCA (Spanish)	Folate	160
Spain	Mendez (2009)	INMA-Menorca	P	1997	392	4	MSCA (Spanish)	Seafood	253
Spain	Morales (2008)	INMA-Menorca	P	1997	326	4	MSCA (Spanish)	DDT, GST	215
Spain	Morales (2009)	INMA-Menorca	P	1997	384	4	MSCA (Spanish)	Maternal smoking, GST	256
Spain	Sunyer (2010)	INMA-Menorca	P	1997	418	4	MSCA (Spanish)	Atopy	74
Spain	Ribas-Fito (2003)	INMA-Ribera d'Ebre	P	1997	92	1.5	BSID-II	Breastfeeding, DDT, HCB, PCB	142
Spain	Alvarez-Pedrerol (2007)	INMA-Ribera d'Ebre, Menorca	P	1997	342	4	MSCA (Spanish)	Thyroid hormones	217
Spain	Ribas-Fito (2007)	INMA-Ribera d'Ebre, Menorca	P	1997	391	4	MSCA (Spanish)	Breastfeeding	143
Spain	Ribas-Fito (2006)	INMA-Ribera d'Ebre, Menorca	P	1997	475	4	MSCA (Spanish)	DDT	210
Spain	Forns (2012)	INMA-Sabadell	P	2004	523	1.5	BSID (Spanish)	Maternal intelligence, Mental health	123
Spain	Guxens (2011)	INMA-Sabadell	P	2004	504	1.5	BSID (Spanish)	Breastfeeding, LC-PUFA	148
Spain	Vrijheid (2010)	INMA-Sabadell	P	2004	530	1.5	BSID (Spanish)	Cell phone use	275
Spain	Gascon (2012)	INMA-Sabadell, Gipuzkoa	P	2004	290	1.5	BISD-III	PBDE	197
Spain	Forns (2012)	INMA-Sabadell, Gipuzkoa, Valencia	P	2004	1391	1.5	BSID (Spanish)	PCB, HCB, DDT	212
Spain	Guxens (2012)	INMA-Sabadell, Gipuzkoa, Valencia, Asturias	P	2004	1889	1.5	BSID-II	NO2, Benzene, Antioxidants	236
Spain	Julvez (2013)	INMA-Sabadell, Gipuzkoa, Valencia, Asturias	P	2004	1761	1.5	BSID (Spanish)	Thyroid hormones	130
Spain	Llop (2012)	INMA-Sabadell, Gipuzkoa, Valencia, Asturias	P	2004	1683	1.5	BSID (Spanish)	Hg	75
Spain	Morales (2012)	INMA-Sabadell, Gipuzkoa, Valencia, Asturias	P	2004	1820	1.5	BSID-II	Vitamin D	255
Spain	Vrijheid (2012)	INMA-Sabadell, Gipuzkoa, Valencia, Asturias	P	2004	1887	1.5	BSID (Spanish)	Indoor air pollution, Gas cooking	193
Spain	Morales (2011)	INMA-Sabadell, Menorca	P	1997, 2004	610	1.5, 4	BSID, MSCA	FADS, ELOVL, LC-PUFA, Breastfeeding	154
Spain	Murcia (2011)	INMA-Valencia	P	2004	691	1.5	BSID	Iodine, Thyroid (Child and Mother)	258
Spain	Rebagliato (2013)	INMA-Valencia	P	2004	1519	1.5	BSID	Iodine	265
Sweden	Gustafsson (2004)	Linkoping	P	1994	73	6.5	WISC-III	Breastfeeding, LC-PUFA	48
Sweden	Schermann (2004)	Uppsala	P	1986	298	10	K-ABC	NICU	267
Sweden	Serenius (2013)	Uppsala	P	2004	982	2.5	BSID-III	Preterm	111
Switzerland	Geiger (2010)		CS		60	7-11	WISC (IV) (Germany)	Sleep duration	234
Taiwan	Chao (2011)	Pingtung	P	2007	70	0.75-1	BSID-III	PBDE	196
Taiwan	Shy (2011)	Pingtung	P	2007	36	0.75-1	BISD-III	PBDE	195
Taiwan	Huang (2012)	Taichung	P	2001	119	2-3,5-6,8-9	BSID-II, WPPSI-RWISC-III (China)	Pb	59
UK	Alati (2008)	ALSPAC	P	1991	13617	8	WISC-III (UK)	Parent alcohol and smoking	216
UK	Beyerlein (2010)	ALSPAC	P	1991	836	4, 8	WPPSI, WISC-III (UK)	Rapid physical growth	56
UK	Emond (2007)	ALSPAC	P	1991	5771	8	WISC-III (UK)	Failure to thrive	55
UK	Evans (2012)	ALSPAC	P	1991	5059	8	WISC-III (UK)	Depression	134
UK	Fraser (2012)	ALSPAC	P	1991	5282	8	WISC-III (UK)	Diabetes	228
UK	Gale (2006)	ALSPAC	P	1991	633	4, 8	WPPSI, WISC-III (UK)	Head growth	103
UK	Gunnell (2005)	ALSPAC	P	1991	547	8	WISC-III (UK)	IGF	235
UK	Hibbeln (2007)	ALSPAC	P	1991	5449	8	WISC-III (UK)	Seafood	237
UK	Lewis (2012)	ALSPAC	P	1991	4167	8	WISC-III (UK)	ADH genes, Alcohol	162
UK	Northstone (2012)	ALSPAC	P	1991	7044	8	WISC-III (UK)	Diet pattern	156
UK	Odd (2012)	ALSPAC	P	1991	6957	8	WISC-III (UK)	Late preterm birth	108
UK	Odd (2009)	ALSPAC	P	1991	5953	8	WISC-III (UK)	Resuscitation	263
UK	Smithers (2013)	ALSPAC	P	1991	7652	8	WISC-III (UK)	Diet trajectory	20
UK	Smithers (2012)	ALSPAC	P	1991	7097	8	WISC-III (UK)	Diet pattern	149
UK	Bergman (2010)		P	2001	125	1.5	BSID-II	Cortisol	43
UK	Cooke (2003)	Liverpool	P	1991	490	7	WISC-III (UK)	Postnatal growth	101
UK	Gale (2008)	Southampton	P	1991	217	9	WASI	Fish	233
UK	Gale (2009)	SWS	P	1998	241	4	WISC-III (UK)	Diet	155
UK	Koenen (2003)	E-Risk	P	1994	2218	5	WISC-III (UK)	Domestic violence	245
UK	Singer (2012)	DAISY	P		79	1	BSID-III	Ecstasy	76
UK	Singer (2012)	DAISY	P		87	0.5	BSID-II	Ecstasy	269
UK	Sylva (2011)	FCCC	P	1998	1201	1.5	BSID-II	Child care characteristics (type of care, quality, stability)	22
U.S.	Arendt (2004)	Cleveland	P		231	7	WISC-III	Cocaine	124
U.S.	Banerjee (2007)	NE US	P		65	0.5, 1.5	BSID-R	Maternal cognitive stimulation	35
U.S.	Bennett (2008)	PA, NJ	P	1993	231	4, 6, 9	SB-IV	Cocaine	86
U.S.	Bouchard (2011)	CHAMACOS	P	1999	329	7	WISC-IV	OP	207
U.S.	Chevrier (2011)	CHAMACOS	P	1999	271	0.5, 1, 2	BSID-II	Maternal thyroid health	222
U.S.	Eskenazi (2013)	CHAMACOS	P	1999	323	5, 7	WPPSI-III, WISC-IV	PBDE	194
U.S.	Eskenazi (2006)	CHAMACOS	P	1999	360	0.5, 1, 2	BSID-II	DDT	209
U.S.	Eskenazi (2007)	CHAMACOS	P	1999	396	0.5, 1, 2	BSID-II	OP	205
U.S.	Eskenazi (2010)	CHAMACOS	P	1999	371	2	BSID-II	PON1	213
U.S.	Buckhalt (2007)	SE US	CS		166	7-11	WJ-III	Sleep patterns	122
U.S.	Busch (2010)		CS		70	3-5	WPPSI-R	Adult attachment, Coherence	220
U.S.	Cabrera (2011)	ECLS-B	P	2001	4200	2	BSID-II (short)	Parent risk factors (parent age, education, language, employment, physical health, depression, alcohol consumption, police record); Child risk factors (physical health, development)	88
U.S.	Hinkle (2012)	ECLS-B	P	2001	6850	2	BSID-II (short)	Prepregnancy BMI	133
U.S.	Nepomnyaschy (2012)	ECLS-B	P	2001	5450	2, 4	BSID-II (short)	Preterm	107
U.S.	Calhoun (2009)	Penn State	CS		571	6-12	WASI	SDB	119
U.S.	Calhoun (2012)	Penn State	CS		508	6-12	WASI	Sleepiness	121
U.S.	Canfield (2003)	Dust Control Efficacy	P-RCT	1994	172	3, 5	SB-IV	Pb	184
U.S.	Jusko (2008)	Dust Control Efficacy	P-RCT	1994	174	6	WPPSI-R	Pb	183
U.S.	Cao (2010)	TLC	P-RCT	1994	765	2, 5, 7	BSID-II, WPPSI-R, WISC-III	Hg	30
U.S.	Cao (2009)	TLC	P-RCT	1994	441	2, 5, 7	BSID-II, WPPSI-R, WISC-III	Cd	186
U.S.	Chen (2005)	TLC	P-RCT	1994	780	2, 5, 7	BSID-II, WPPSI-R, WISC-III	Pb	187
U.S.	Chiodo (2009)	Detroit-Wayne St Univ	P		75	7.5	WPPSI-R	Alcohol	161
U.S.	Chiodo (2004)	Detroit Longitudinal Study	P	1986	237	7.5	WISC-III	Pb	182
U.S.	Jacobson (2004)	Detroit Longitudinal Study	P	1986	337	7.5	WISC-III	Alcohol	239
U.S.	Craig (2012)	FBR	P	2004	198	2	BSID-III	Thyroid hormone	132
U.S.	Davis (2010)	Irvine, CA	P		125	1	BSID-II	Cortisol and distress (stress/anxiety/depression)	139
U.S.	DePrince (2009)	SW US	CS		110	9-12	WISC-IV	Familial trauma	224
U.S.	Emancipator (2006)	Cleveland Sleep Study	CS	1988	835	8-11	K-ABC	SDB	118
U.S.	Engel (2011)	Mt Sinai	P	1998	298	1, 2, 6-9	BSID-II, WPPSI-III, WISC-IV	PON1, OP	214
U.S.	Escobar (2007)	JIFee	P	1995	274	5	WPPSI-R	Dehydration	225
U.S.	Fishbein (2009)	Cicero	CS		553	10-12	RCPM	Abuse, Neglect, School and parental stress, Community violence and problems	68
U.S.	Frank (2005)	Boston	P	1990	170	4	WPPSI-R	Cocaine	42
U.S.	Goldschmidt (2008)	MHPCD-Magee	P	1983	648	6	SB-IV	Marijuana	28
U.S.	Willford (2006)	MHPCD-Magee	P	1983	611	10	SB-IV	Alcohol	280
U.S.	Gottlieb (2004)	Boston	CS	1995	205	5	WPPSI-R	SDB	113
U.S.	Han (2005)	NICHD SECC	P	1991	915	1.25, 2, 3	BSID	Maternal nonstandard work schedule	27
U.S.	Herbstman (2010)	CCCEH-WTC	P	2001	152	1, 2, 3, 4, 6	BSID-II, WPPSI-R	PBDE	198
U.S.	Lederman (2008)	CCCEH-WTC	P	2001	151	1, 2, 3, 4	BSID-II, WPPSI-R	Hg	247
U.S.	Perera (2007)	CCCEH-WTC	P	2001	98	3	BSID-II	PAH, BaP-DNA adducts, ETS	126
U.S.	Horton (2011)	CCCEH-NYC Mothers and Newborns	P	1998	348	3	BSID-II	Piperonyl butoxide, Permethrin	34
U.S.	Lovasi (2011)	CCCEH-NYC Mothers and Newborns	P	1998	266	3	BSID-II	Neighborhood characterisics, Chlorpyrifos	206
U.S.	Perera (2006)	CCCEH-NYC Mothers and Newborns	P	1998	183	3	BSID-II	PAH	33
U.S.	Perera (2009)	CCCEH-NYC Mothers and Newborns	P	1998	249	5	WPPSI-R	PAH	37
U.S.	Rauh (2004)	CCCEH-NYC Mothers and Newborns	P	1998	226	2	BSID-II	ETS, Material hardship	31
U.S.	Rauh (2006)	CCCEH-NYC Mothers and Newborns	P	1998	254	1, 2, 3	BSID-II	Chlorpyrifos	32
U.S.	Rauh (2011)	CCCEH-NYC Mothers and Newborns	P	1998	265	7	WISC-IV	Chlorpyrifos	36
U.S.	Whyatt (2012)	CCCEH-NYC Mothers and Newborns	P	1999	319	3	BSID-II	Phthalates	201
U.S.	Kaemingk (2003)	TuCASA	P	1999	149	6-12	WASI	SDB	115
U.S.	Kilbride (2004)	Kansas City	P	1983	50	3 or 5	SB-IV	LBW	94
U.S.	Kolobe (2004)	Chicago	CS		62	0.75-1	BSID-II	Parenting behavior, Parent-child interaction	170
U.S.	Lewis (2004)		P	1991	236	1, 1.5, 2, 3	BSID	Cocaine	248
U.S.	Li (2004)	WV	CS	2001	122	3-5	WPPSI-R (short)	Computer access	249
U.S.	Loman (2009)		CS		269	8-11	WISC-III (short)	Institutionalization, Adoption	168
U.S.	Lowe (2010)	NM	P	2005	94	1.5-2	BSID-II	Mother-child interactions	171
U.S.	Lugo-Gil (2008)	EHSRE	P-RCT	1996	2089	1.5, 2, 3	BSID-II	Family resources (maternal reading, education, living arrangements, income); Parenting quality	23
U.S.	Raikes (2006)	EHSRE	P-RCT	1996	1101	2, 3	BSID-II	Mother to child book reading	26
U.S.	Tamis-Lemonda (2004)	EHSRE	P-RCT	1996	111	2, 3	BSID-II	Parenting behavior	67
U.S.	Lynch (2012)	NYSACS	P	1991	44	2	BSID-II	PCB	250
U.S.	Mackner (2003)	Baltimore	P		226	0.5, 1, 1.5, 3, 4, 5, 6	BSID, WPPSI-R (short)	Failure to thrive	251
U.S.	Messinger (2004)	MLS	P	1993	1227	1, 2, 3	BSID-II	Cocaine, Opiate	254
U.S.	Min (2009)		P	1994	278	4, 9, 11	WPPSI-R, WISC-IV	Pb	185
U.S.	Morrow (2006)		P	1990	409	7	WISC-III (short)	Cocaine	257
U.S.	Nair (2008)		P-RCT		173	6	SB-IV	Drugs	77
U.S.	Nelson (2004)	Cleveland	P	1994	274	2, 4	BSID-II, WPPSI-R	Iron deficiency, Anemia	87
U.S.	Singer (2004)	Cleveland	P	1994	376	4	WPPSI-R	Cocaine	268
U.S.	Orchinik (2011)	Rainbow Babies	P	2001	259	5-6	BSID-II	LBW	91
U.S.	Pears (2005)		CS		153	3-6	WPPSI-R (short)	Foster care	167
U.S.	Richardson (2008)	Magee	P	1988	259	10	BSID	Cocaine	25
U.S.	Signore (2008)	IGP	P	1985	404	5	WPPSI-R	Choline	29
U.S.	Short (2003)	BPD High Risk	P	1989	272	8	WISC-III	LBW	96
U.S.	Smith (2011)	IDEAL	P	2002	356	1, 2, 3	BSID-II	Methamphetamine	81
U.S.	Stewart (2003)	Oswego NIDP	P	1991	212	3, 4.5	MSCA	PCB	271
U.S.	Stewart (2008)	Oswego NIDP	P	1991	156	9	WISC-III	PCB	270
U.S.	Stewart (2012)	Oswego NIDP	P	1991	158	9, 11	WISC-III	PCB	204
U.S.	Suglia (2008)	MISS	P	1986	202	8-11	K-BIT	Black carbon	272
U.S.	Surkan (2007)	NECAT	CS-RCT	1997	512	6-10	WISC-III	Pb	24
U.S.	Thompson (2007)	Vaccine Safety Datalink	R	2003	1047	7-10	WASI	Thimerosal (Hg)	274
U.S.	Waisbren (2003)	PKU Collaborative Study	P		298	7	WISC-R	PKU	276
India, Pakistan, Zambia	Carlo (2012)	FIRST BREATH	P-RCT	2006	201	1	BSID-II	Resuscitation	221
Norway , Sweden	von Ehrenstein (2009)	NICHD SGA Study	P	1986	1059	1, 5	BSID, WPPSI-R	Fetal growth	49
Faroe Islands, New Zealand, Seychelles	Axelrad (2007)		P, Pooled	1980s	1797	6-9	WPPSI, WISC-III	Hg	218
UK, Brazil	Brion (2011)	ALSPAC, Pelotas	P, Meta-Analysis	1991, 1993	6918	4, 8	WISC-III (UK), WPPSI-R	Breastfeeding	147
UK, Ireland	Marlow (2005)	EpiCURE	P	1995	401	5-7	K-ABC	Preterm	110
U.S., Mexico, Australia, Yugoslavia	Lanphear (2005)	Port Pirie (Tong), Rochester (Canfield), Cleveland, Boston, Yugo, Mexico (Schnaas)	P, Pooled	<1995	1333	4-10	WISC, WISC-R, WISC-III, WPPSI	Pb	45
U.S., Poland	Wang (2010)	CCCEH-NYC Mothers and Infants, Poland Mother and Newborn	P, Pooled	1998, 2001	547	1, 2, 3	BSID-II	CYP1, GST, PAH	21
Note: Publications are grouped by study and country. *Prospective (P), Retrospective (R), Cross-Sectional (CS), Randomized Control Trial (RCT). **Bayley Scales of Infant Development (BSID), Kaufman Assessment Battery for Children or Brief Intelligence Test (K-ABC, K-BIT), McCarthy Scales of Children's Abilities (MSCA), Raven's Standard or Colored Progressive Matrices (RSPM, RCPM), Revised (R), St…
